# Supplementary material
Source: HighWire-hosted journal article supplement (https://hw-f5-jim.highwire.org/content/jim-2021-002161)
Supplement: inline-supplementary-material-2 [file inline-supplementary-material-2.pdf]

**Table 1S (Supplemental material). Animal models of GC in infectious disease.**

|                         | Ref          | Disease               | Model                      | Glucocorticoid     | Results                                                                                         |
|-------------------------|--------------|-----------------------|----------------------------|--------------------|-------------------------------------------------------------------------------------------------|
| <i>COVID-19</i>         | Ye 2021      | SARS-CoV-2            | Golden Syrian hamster      | methylprednisolone | protection against desquamation, inflammation, vessel congestion, wall thickening               |
|                         | Rocha 2021   | SARS-CoV-2            | Golden Syrian hamster      | PT150              | decreased viral replication, decreased inflammation, tissue damage, IL-6                        |
| <i>Influenza</i>        | Xu 2009      | H5N1                  | BALB/c mice                | dexamethasone      | no improvement in mortality or clinical features e.g. hypoxemia, inflammation, cytokine release |
|                         | Salomon 2007 | H5N1                  | Mouse                      | corticosterone     | no improvement in morbidity or mortality                                                        |
| <i>Fungal pneumonia</i> | Li 2012      | H1N1                  | Nouse                      | dexamethasone      | improved survival and histological score                                                        |
|                         | Jakab 2016   | Candida albicans      | <i>in vitro</i> epithelium | betamethasone      | enhanced fungal invasion and cell damage, decreased IL-6, IL-8                                  |
|                         | Clemons 2011 | aspergillus fumigatus | Mouse                      | triamcinolone      | enhanced susceptibility to fungal infection                                                     |
